# Supplementary material for: Synthesis, characterization and luminescence properties of homoleptic platinum(ii) acetylide complexes
Source: Royal Society of Chemistry journal article supplement (doi:10.1039/b308291a), 2003-01-01
Supplement: b308291a.pdf [file b308291a.pdf]

## Supplementary data"

### Synthesis, Characterization and Luminescence Properties of Homoleptic Platinum(II) Acetylide Complexes.

José Benito,<sup>a</sup> Jesús R. Berenguer,<sup>a</sup> Juan Forniés,<sup>\*b</sup> Belén Gil,<sup>a</sup> Julio Gómez,<sup>a</sup> and Elena Lalinde<sup>\*a</sup>

<sup>a</sup> Departamento de Química-Grupo de Síntesis Química de La Rioja, UA-CSIC, Universidad de La Rioja, 26006, Logroño, Spain. E-mail: elena.lalinde@dq.unirioja.es

<sup>b</sup> Departamento de Química Inorgánica, Instituto de Ciencia de Materiales de Aragón, Universidad de Zaragoza-Consejo Superior de Investigaciones Científicas, 50009 Zaragoza, Spain. E-mail: forniesj@posta.unizar.es

### Experimental

The NMR spectral assignments follow the numbering scheme shown in the following figure.

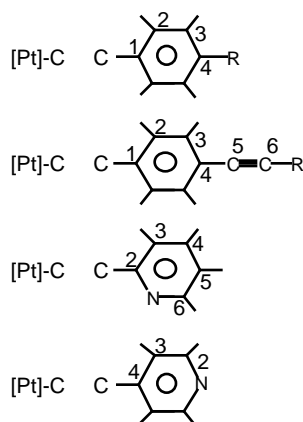

#### (NBu<sub>4</sub>)<sub>2</sub>[Pt(C≡CC<sub>6</sub>H<sub>5</sub>)<sub>4</sub>] **1**

The synthesis of this complex has been previously reported.<sup>1</sup>  $\delta_C\{^1\text{H}\}$  (CD<sub>3</sub>COCD<sub>3</sub>, 223K): 133.4 [s, <sup>3</sup>J(Pt-C) ~ 25, ipso-C, Ph], 132.0 (s, ortho-C, Ph), 128.2 (s, meta-C, Ph), 123.3 (s, para-C, Ph),

120.9 [s,  $^1J(\text{Pt-C})$  989.8, C ], 104.1 [s,  $^2J(\text{Pt-C})$  287.4, C ], 60.3 (s, N-CH<sub>2</sub>-, NBu<sub>4</sub>), 25.5 (s, -CH<sub>2</sub>-, NBu<sub>4</sub>), 20.7 (s, -CH<sub>2</sub>-, NBu<sub>4</sub>) and 14.3 (s, -CH<sub>3</sub>, NBu<sub>4</sub>).

#### Synthesis of (NBu<sub>4</sub>)<sub>2</sub>[Pt{C≡C(4-CF<sub>3</sub>)C<sub>6</sub>H<sub>4</sub>}]<sub>4</sub> **4**.

This complex was prepared, as a yellow solid, following a similar procedure to that described for **2**: [PtCl<sub>2</sub>(tht)<sub>2</sub>] (0.30 g, 0.68 mmol), LiC≡C(4-CF<sub>3</sub>)C<sub>6</sub>H<sub>4</sub> (5.42 mmol), (NBu<sub>4</sub>)Br (0.55 g, 1.70 mmol); (0.68g, 74%) (Found: C, 59.86; H, 6.27; N, 2.37%. C<sub>68</sub>H<sub>88</sub>N<sub>2</sub>F<sub>12</sub>Pt requires: C, 60.21; H, 6.54; N, 2.07%);  $\tilde{\nu}_{\text{max}}/\text{cm}^{-1}$  (C≡C) 2084vs;  $\delta_{\text{H}}$  (CD<sub>3</sub>COCD<sub>3</sub>, 293 K) 7.42, 7.36 [16H, AB system,  $J(\text{H-H})$  7.9, (4-CF<sub>3</sub>)C<sub>6</sub>H<sub>4</sub>], 3.70 (16H, m, N-CH<sub>2</sub>-, NBu<sub>4</sub>), 1.88 (16H, m, -CH<sub>2</sub>-, NBu<sub>4</sub>), 1.54 (16H, q, -CH<sub>2</sub>-, NBu<sub>4</sub>) and 0.92 (24H, t, -CH<sub>3</sub>, NBu<sub>4</sub>);  $\delta_{\text{F}}$  (CD<sub>3</sub>COCD<sub>3</sub>, 293 K) -145.72 [s, CF<sub>3</sub>, (4-CF<sub>3</sub>)C<sub>6</sub>H<sub>4</sub>];  $\delta_{\text{C}}\{^1\text{H}\}$  (CD<sub>3</sub>COCD<sub>3</sub>, 223K) 135.5 [q,  $^5J(\text{C-F})$  1.2, C<sup>1</sup>], 130.7 (s, C<sup>2</sup>), 125.0 [s,  $^1J(\text{C-Pt})$  997.0, C ], 124.9 [q,  $^1J(\text{C-F})$  270.0, CF<sub>3</sub>, (4-CF<sub>3</sub>)C<sub>6</sub>H<sub>4</sub>], 124.4 [q,  $^3J(\text{C-F})$  3.7, C<sup>3</sup>], 122.9 [q,  $^2J(\text{C-F})$  30.9, C<sup>4</sup>], 103.0 [s,  $^2J(\text{C-Pt})$  286.3, C ], 58.4 (s, N-CH<sub>2</sub>-, NBu<sub>4</sub>), 23.9 (s, -CH<sub>2</sub>-, NBu<sub>4</sub>), 19.5 (s, -CH<sub>2</sub>-, NBu<sub>4</sub>) and 13.4 (s, -CH<sub>3</sub>, NBu<sub>4</sub>);  $m/z$  = 1405 ([Pt<sub>2</sub>(C≡CC<sub>6</sub>H<sub>4</sub>CF<sub>3</sub>)<sub>6</sub> + 1]<sup>-</sup>, 20%), 1236 ([Pt<sub>2</sub>(C≡CC<sub>6</sub>H<sub>4</sub>CF<sub>3</sub>)<sub>5</sub> + 1]<sup>-</sup>, 22%), 872 ([Pt(C≡CC<sub>6</sub>H<sub>4</sub>CF<sub>3</sub>)<sub>4</sub> + 1]<sup>-</sup>, 8%), 703 ([Pt(C≡CC<sub>6</sub>H<sub>4</sub>CF<sub>3</sub>)<sub>3</sub> + 1]<sup>-</sup>, 100%);  $\mu_{\text{M}}(\text{CH}_3\text{NO}_2)$ : 97 cm<sup>2</sup> mol<sup>-1</sup>.

#### Synthesis of (NBu<sub>4</sub>)<sub>2</sub>[Pt{C≡C(4-OMe)C<sub>6</sub>H<sub>4</sub>}]<sub>4</sub>·2H<sub>2</sub>O **5a**·2H<sub>2</sub>O

This complex has been used as precursor to a cluster Pt<sub>2</sub>Cu<sub>4</sub> complex,<sup>2</sup> but its synthesis and spectroscopic data have not been reported. This complex was prepared, as a pale yellow solid, following an identical procedure to complex **2**, starting from [PtCl<sub>2</sub>(tht)<sub>2</sub>] (0.30 g, 0.68 mmol), LiC≡C(4-OMe)C<sub>6</sub>H<sub>4</sub> (3.73 mmol) and (NBu<sub>4</sub>)Br (0.55 g, 1.70 mmol); (0.67g, 82%) (Found: C, 66.02; H, 8.44; N, 2.02%. C<sub>68</sub>H<sub>104</sub>N<sub>2</sub>O<sub>6</sub>Pt requires: C, 65.83; H, 8.45; N, 2.26%);  $\tilde{\nu}_{\text{max}}/\text{cm}^{-1}$  (C≡C) 2085vs ; bands at 3455s br, 3422s br, 1651vs and 1640vs due to the presence of H<sub>2</sub>O are also observed;  $\delta_{\text{H}}$  (CD<sub>3</sub>COCD<sub>3</sub>, 293 K) 7.16 [8H, d,  $J(\text{HH})$  8.5], 6.67 [8H, d,  $J(\text{H-H})$  8.5, C<sub>6</sub>H<sub>4</sub>, (4-

OMe)C<sub>6</sub>H<sub>4</sub>], 3.75 (16H, m, N-CH<sub>2</sub>-, NBu<sub>4</sub>), 3.72 (12H, s, OMe, (4-OMe)C<sub>6</sub>H<sub>4</sub>), 1.85 (16H, m, -CH<sub>2</sub>-, NBu<sub>4</sub>), 1.53 (16H, m, -CH<sub>2</sub>-, NBu<sub>4</sub>) and 0.91 (24H, t, -CH<sub>3</sub>, NBu<sub>4</sub>); δ<sub>C</sub>{<sup>1</sup>H} (CD<sub>3</sub>COCD<sub>3</sub>, 223K) 155.1 (s, C<sup>d</sup>), 131.3 (s, C<sup>2/3</sup>), 123.8 (s, C<sup>1</sup>), 115.8 [s, <sup>1</sup>J(C-Pt) 990.5, C ], 112.4 (s, C<sup>2/3</sup>), 101.2 [s, <sup>2</sup>J(C-Pt) 286.0, C ], 58.1 (s, N-CH<sub>2</sub>-, NBu<sub>4</sub>), 53.9 (s, OMe, (3-OMe)C<sub>6</sub>H<sub>4</sub>), 23.7 (s, -CH<sub>2</sub>-, NBu<sub>4</sub>), 19.3 (s, -CH<sub>2</sub>-, NBu<sub>4</sub>) and 13.3 (s, -CH<sub>3</sub>, NBu<sub>4</sub>); *m/z* 1201 ([Pt(C C<sub>6</sub>H<sub>4</sub>OMe)<sub>4</sub>(NBu<sub>4</sub>)<sub>2</sub>-3]<sup>-</sup>, 63%);  $\mu_{\text{M}}(\text{CH}_3\text{NO}_2)$ : 91 <sup>-1</sup> cm<sup>2</sup> mol<sup>-1</sup>.

### Synthesis of (NBu<sub>4</sub>)<sub>2</sub>[Pt{C≡C(3-OMe)C<sub>6</sub>H<sub>4</sub>}<sub>4</sub>] 5b

This complex was prepared, as a very pale yellow solid, following the procedure described for **2**, using [PtCl<sub>2</sub>(tht)<sub>2</sub>] (0.30 g, 0.68 mmol), LiC C(3-OMe)C<sub>6</sub>H<sub>4</sub> (3.73 mmol) and (NBu<sub>4</sub>)Br (0.55 g, 1.70 mmol); (0.74g, 90%) (Found: C, 67.45; H, 8.47; N, 2.38%. C<sub>68</sub>H<sub>100</sub>N<sub>2</sub>O<sub>4</sub>Pt requires: C, 67.80; H, 8.37; N, 2.33%);  $\tilde{\nu}_{\text{max}}/\text{cm}^{-1}$  (C C) 2078 (s);  $\nu_{\text{H}}$  (CD<sub>3</sub>COCD<sub>3</sub>, 293 K) 6.98 [4H, t, *J*(H-H) 8.0], 6.83 (8H, m), 6.51 [4H, dd, 7.4, *J*(H-H) 1.7, C<sub>6</sub>H<sub>4</sub>, (3-OMe)C<sub>6</sub>H<sub>4</sub>], 3.74 (16H, m, N-CH<sub>2</sub>-, NBu<sub>4</sub>), 3.72 (12H, s, OMe, (3-OMe)C<sub>6</sub>H<sub>4</sub>), 1.87 (16H, m, -CH<sub>2</sub>-, NBu<sub>4</sub>), 1.55 (16H, m, -CH<sub>2</sub>-, NBu<sub>4</sub>) and 0.92 (24H, t, -CH<sub>3</sub>, NBu<sub>4</sub>); δ<sub>C</sub>{<sup>1</sup>H} (CD<sub>3</sub>COCD<sub>3</sub>, 223K) 158.5 [s, C-OMe, (3-OMe)C<sub>6</sub>H<sub>4</sub>], 132.5 (s), 128.0 (s), 122.8 [s, C<sub>6</sub>H<sub>4</sub>, (3-OMe)C<sub>6</sub>H<sub>4</sub>], 119.4 [s, <sup>1</sup>J(C-Pt) 990.2, C ], 114.8 (s), 108.4 [s, C<sub>6</sub>H<sub>4</sub>, (3-OMe)C<sub>6</sub>H<sub>4</sub>], 102.6 [s, <sup>2</sup>J(C-Pt) 288.1, C ], 58.2 (s, N-CH<sub>2</sub>-, NBu<sub>4</sub>), 53.7 [s, OMe, (3-OMe)C<sub>6</sub>H<sub>4</sub>], 23.7 (s, -CH<sub>2</sub>-, NBu<sub>4</sub>), 19.4 (s, -CH<sub>2</sub>-, NBu<sub>4</sub>) and 13.4 (s, -CH<sub>3</sub>, NBu<sub>4</sub>); *m/z* 1178 ([Pt<sub>2</sub>(C C<sub>6</sub>H<sub>4</sub>OMe)<sub>6</sub>+2]<sup>-</sup>, 15%), 1046 ([Pt<sub>2</sub>(C C<sub>6</sub>H<sub>4</sub>OMe)<sub>5</sub>+1]<sup>-</sup>, 10%), 720 ([Pt(C C<sub>6</sub>H<sub>4</sub>OMe)<sub>4</sub>+1]<sup>-</sup>, 14%);  $\mu_{\text{M}}(\text{CH}_3\text{NO}_2)$ : 94 <sup>-1</sup> cm<sup>2</sup> mol<sup>-1</sup>.

### Synthesis of (NBu<sub>4</sub>)<sub>2</sub>[Pt{C≡C(4-CN)C<sub>6</sub>H<sub>4</sub>}<sub>4</sub>] 6

This complex was prepared as a lemon yellow solid following a similar procedure to that described for **2**, starting from [PtCl<sub>2</sub>(tht)<sub>2</sub>] (0.20 g, 0.45 mmol), LiC C(4-CN)C<sub>6</sub>H<sub>4</sub> (2.71 mmol) and (NBu<sub>4</sub>)Br (0.36 g, 1.13 mmol); (0.22g, 45%) (Found: C, 68.55; H, 7.51; N, 6.90%. C<sub>68</sub>H<sub>88</sub>N<sub>6</sub>Pt requires: C,

68.95; H, 7.49; N, 7.10%);  $\tilde{\nu}_{\max}/\text{cm}^{-1}$  (C N) 2218vs and (C C) 2080vs, 2041sh;  $\delta_{\text{H}}$  ( $\text{CDCl}_3$ , 293 K) 7.41, 7.29 [16H, AB system,  $J(\text{H-H})$  7.3, (4-CN) $\text{C}_6\text{H}_4$ ], 3.47 (16H, m, N- $\text{CH}_2$ -,  $\text{NBu}_4$ ), 1.64 (16H, m, - $\text{CH}_2$ -,  $\text{NBu}_4$ ), 1.44 (16H, m, - $\text{CH}_2$ -,  $\text{NBu}_4$ ), 0.86 (24H, t, - $\text{CH}_3$ ,  $\text{NBu}_4$ );  $\delta_{\text{C}}\{^1\text{H}\}$  ( $\text{CD}_3\text{COCD}_3$ , 223K) 135.8 (s), 131.1 (s, CH), 130.7 (s, CH), 128.46 [s,  $\text{C}_6\text{H}_4$ , (4-CN) $\text{C}_6\text{H}_4$ ], 119.3 (tentatively assigned to C ), 104.1 [s,  $^2J(\text{C-Pt})$  288.0, C ], 58.0 (s, N- $\text{CH}_2$ -,  $\text{NBu}_4$ ), 23.4 (s, - $\text{CH}_2$ -,  $\text{NBu}_4$ ), 19.1 (s, - $\text{CH}_2$ -,  $\text{NBu}_4$ ) and 13.2 (s, - $\text{CH}_3$ ,  $\text{NBu}_4$ );  $m/z$  696 ( $[\text{Pt}(\text{C} \text{CC}_6\text{H}_4\text{CN})_4 - 3]^-$ , 22%);  $\mu_{\text{M}}(\text{CH}_3\text{NO}_2)$ : 93  $\text{cm}^2 \text{mol}^{-1}$ .

### Synthesis of $(\text{NBu}_4)_2[\text{Pt}\{\text{C}\equiv\text{C}(4\text{-C}\equiv\text{CH})\text{C}_6\text{H}_4\}_4]\cdot 2\text{H}_2\text{O} \cdot 7\cdot 2\text{H}_2\text{O}$

To a fresh (-78°C) solution of  $\text{LiC}\equiv\text{C}(4\text{-C}\equiv\text{CH})\text{C}_6\text{H}_4$  (4.35 mmol) in  $\text{Et}_2\text{O}$  (ca. 30  $\text{cm}^3$ ),  $[\text{PtCl}_2(\text{tht})_2]$  (0.35 g, 0.80 mmol) was added, and the mixture stirred at this temperature for 2.5 hours. Then, it was slowly allowed to reach room temperature (ca. 2 h) and evaporated to dryness. The yellow residue was treated with cold deoxygenated  $\text{H}_2\text{O}$  (~ 40  $\text{cm}^3$ ) and filtered through celite. The resulting solution was treated with  $(\text{NBu}_4)\text{Br}$  (0.51 g, 1.6 mmol) to yield  $(\text{NBu}_4)_2[\text{Pt}\{\text{C}\equiv\text{C}(4\text{-C}\equiv\text{CH})\text{C}_6\text{H}_4\}_4]\cdot 2\text{H}_2\text{O} \cdot 7\cdot 2\text{H}_2\text{O}$  as a yellow solid. This complex is very unstable and must be kept under Ar at low temperature (-45°C); (0.55g, 57%) (Found: C, 70.34; H, 7.93; N, 2.06%.  $\text{C}_{72}\text{H}_{96}\text{N}_2\text{O}_2\text{Pt} \cdot 7\cdot 2\text{H}_2\text{O}$ ) requires C, 71.08; H, 7.95; N, 2.30% and  $\text{C}_{72}\text{H}_{98}\text{N}_2\text{O}_3\text{Pt} \cdot 7\cdot 3\text{H}_2\text{O}$ ) requires C, 70.04; H, 8.00; N, 2.27);  $\tilde{\nu}_{\max}/\text{cm}^{-1}$  (CH) 3200s, (C C) 2073vs br, bands at 3450br and 1640br due to the presence of  $\text{H}_2\text{O}$  are also observed;  $\delta_{\text{H}}$  ( $\text{CDCl}_3$ , 293 K) 7.27, 7.21 [16H, AB system,  $J(\text{H-H})$  8.3,  $\text{C}_6\text{H}_4$ , (4-C $\equiv\text{CH})\text{C}_6\text{H}_4$ ], 3.50 (16H, m, N- $\text{CH}_2$ -,  $\text{NBu}_4$ ), 3.07 (4H, s, CH), 2.16 (4H, br,  $\text{H}_2\text{O}$ ), 1.63 (16H, m, - $\text{CH}_2$ -,  $\text{NBu}_4$ ), 1.45 (16H, m, - $\text{CH}_2$ -,  $\text{NBu}_4$ ) and 0.87 (24H, t, - $\text{CH}_3$ ,  $\text{NBu}_4$ );  $\delta_{\text{C}}\{^1\text{H}\}$  ( $\text{CD}_3\text{COCD}_3$ , 223K) 132.0 (s), 130.8 (s, CH), 130.2 [s, CH,  $\text{C}_6\text{H}_4$ , (4-C $\equiv\text{CH})\text{C}_6\text{H}_4$ ], 124.0 [s,  $^1J(\text{C-Pt})$  993.0, C ], 115.1 [s,  $\text{C}_6\text{H}_4$ , (4-C $\equiv\text{CH})\text{C}_6\text{H}_4$ ], 103.2 [s,  $^2J(\text{C-Pt})$  289.0, C ], 83.9 (s,  $\text{C}^6$ ), 78.5 (s,  $\text{C}^5$ ), 58.0 (s, N- $\text{CH}_2$ -,  $\text{NBu}_4$ ), 23.4 (s, - $\text{CH}_2$ -,  $\text{NBu}_4$ ), 19.2 (s, - $\text{CH}_2$ -,  $\text{NBu}_4$ ) and 13.2 (s, - $\text{CH}_3$ ,  $\text{NBu}_4$ );  $m/z$  938 ( $\{\text{Pt}(\text{C} \text{CC}_6\text{H}_4\text{C}\equiv\text{CH})_4\}(\text{NBu}_4) + 1^-$ , 100%);  $\mu_{\text{M}}(\text{CH}_3\text{NO}_2)$ : 93  $\text{cm}^2 \text{mol}^{-1}$ .

### Synthesis of (NBu<sub>4</sub>)<sub>2</sub>[Pt{C≡C(4-C≡CPh)C<sub>6</sub>H<sub>4</sub>}<sub>4</sub>] **8**

Complex **8** was prepared, as a yellow solid, by treating [PtCl<sub>2</sub>(tht)<sub>2</sub>] (0.25 g, 0.57 mmol) with LiC C(4-C CPh)C<sub>6</sub>H<sub>4</sub> (3.39 mmol) and (NBu<sub>4</sub>)Br (0.46 g, 1.41 mmol) in a similar way to that described above for complex **3**; (0.32g, 38%) (Found: C, 77.34; H, 7.37; N, 1.80%. C<sub>96</sub>H<sub>108</sub>N<sub>2</sub>Pt requires: C, 77.65; H, 7.33; N, 1.89%);  $\tilde{\nu}_{\max}/\text{cm}^{-1}$  (C C) 2209m (C CPh), 2075s br (PtC C);  $\delta_{\text{H}}$  (CD<sub>3</sub>COCD<sub>3</sub>, 293 K) 7.52 (8H, m), 7.39 [12H, m, Ph, C C(4-C CPh)C<sub>6</sub>H<sub>4</sub>], 7.30, 7.25 [16H, AB system, *J*(H-H) 8.3, C<sub>6</sub>H<sub>4</sub>, (4-C CPh)C<sub>6</sub>H<sub>4</sub>], 3.68 (16H, m, N-CH<sub>2</sub>-, NBu<sub>4</sub>), 1.87 (16H, m, -CH<sub>2</sub>-, NBu<sub>4</sub>), 1.53 (16H, m, -CH<sub>2</sub>-, NBu<sub>4</sub>) and 0.95 (24H, t, -CH<sub>3</sub>, NBu<sub>4</sub>);  $\delta_{\text{C}}\{^1\text{H}\}$  (CDCl<sub>3</sub>, 223K) 132.2 (s), 131.0 (CH), 130.8 (overlapping of two CH carbons), 128.6 (s, CH), 128.1 [s, C<sub>6</sub>H<sub>4</sub> and Ph, (4-CC CPh)C<sub>6</sub>H<sub>4</sub>], 124.6 [s, <sup>1</sup>*J*(C-Pt) 1003.0, C ], 123.2 (s), 116.2 [s, C<sub>6</sub>H<sub>4</sub> and Ph, (4-CC CPh)C<sub>6</sub>H<sub>4</sub>], 104.0 [s, <sup>2</sup>*J*(C-Pt) 286.0, C ], 90.3 (s), 88.9 (s, C<sup>5</sup> and C<sup>6</sup>), 58.4 (s, N-CH<sub>2</sub>-, NBu<sub>4</sub>), 23.9 (s, -CH<sub>2</sub>-, NBu<sub>4</sub>), 19.6 (s, -CH<sub>2</sub>-, NBu<sub>4</sub>) and 13.6 (s, -CH<sub>3</sub>, NBu<sub>4</sub>); *m/z* 797 ([Pt(C CC<sub>6</sub>H<sub>4</sub>C<sub>2</sub>Ph)<sub>3</sub> - 1]<sup>-</sup>, 83%), 598 ([Pt(C CC<sub>6</sub>H<sub>4</sub>C<sub>2</sub>Ph)<sub>2</sub> + 1]<sup>-</sup>, 100%) and 396 ([Pt(C CC<sub>6</sub>H<sub>4</sub>C<sub>2</sub>Ph)]<sup>-</sup>, 63%);  $\mu_{\text{M}}(\text{CH}_3\text{NO}_2)$ : 119 cm<sup>2</sup>mol<sup>-1</sup>.

### Synthesis of (NBu<sub>4</sub>)<sub>2</sub>[Pt(C≡CC<sub>5</sub>H<sub>4</sub>N-2)] **9a**

This complex was prepared following an identical procedure to that described for **2**, but, in this case, the temperature of the LiC CC<sub>5</sub>H<sub>4</sub>N-2 ethereal solution was -50°C. In addition, the final precipitate of **9a**, obtained after the addition of (NBu<sub>4</sub>)Br, was extracted with CH<sub>2</sub>Cl<sub>2</sub> and the solution dried with anhydrous MgSO<sub>4</sub> and evaporated to dryness. The addition of cold Et<sub>2</sub>O (ca. 5 cm<sup>3</sup>) gives **9a** as a brown solid. The following amounts of the precursors were used: 0.50 g (1.13 mmol) of [PtCl<sub>2</sub>(tht)<sub>2</sub>], 7.9 mmol of LiC CC<sub>5</sub>H<sub>4</sub>N-2 and 0.73 g (2.26 mmol) of (NBu<sub>4</sub>)Br; (0.33g, 27%). (Found: C, 65.93; H, 8.03; N, 7.45%. C<sub>60</sub>H<sub>88</sub>N<sub>6</sub>Pt requires: C, 66.21; H, 8.15; N, 7.72%);  $\tilde{\nu}_{\max}/\text{cm}^{-1}$  (C C) 2081vs, 2059 sh;  $\delta_{\text{H}}$  (CDCl<sub>3</sub>, 293 K) 8.24 [d, *J*(H-H) 4.2, 4H<sup>6</sup>], 7.34 [td, *J*(H-H) ~

7.6,  $J(\text{H-H}) \sim 1.5$ ,  $4\text{H}^4$ ), 7.23 [d,  $J(\text{H-H}) \sim 7.9$ ,  $4\text{H}^3$ ], 6.80 [t,  $J(\text{H-H}) \sim 5.9$ ,  $4\text{H}^5$ ], 3.55 (16H, m, N- $\text{CH}_2^-$ ,  $\text{NBu}_4$ ), 1.66 (16H, m,  $-\text{CH}_2^-$ ,  $\text{NBu}_4$ ), 1.42 (16H, m,  $-\text{CH}_2^-$ ,  $\text{NBu}_4$ ) and 0.83 (24H, t,  $-\text{CH}_3$ ,  $\text{NBu}_4$ ), assignment based on a  $^1\text{H}$ - $^1\text{H}$  COSY.  $\delta_{\text{C}}\{^1\text{H}\}$  ( $\text{CDCl}_3$ , 298 K) 148.8 [s,  $^3J(\text{Pt-C})$  25.8,  $\text{C}^2$ ], 147.9 (s,  $\text{C}^6$ ), 134.3 (s,  $\text{C}^4$ ), 126.1 ( $\text{C}^3$ ), 120.5 [s,  $^1J(\text{C-Pt})$  991.7, C ], 117.6 ( $\text{C}^5$ ), 105.2 [s,  $^2J(\text{C-Pt})$  287.0, C ], 58.8 (s, N- $\text{CH}_2^-$ ,  $\text{NBu}_4$ ), 24.1 (s,  $-\text{CH}_2^-$ ,  $\text{NBu}_4$ ), 19.4 (s,  $-\text{CH}_2^-$ ,  $\text{NBu}_4$ ) and 13.5 (s,  $-\text{CH}_3$ ,  $\text{NBu}_4$ ), assignment based on a  $^{13}\text{C}$ - $^1\text{H}$  correlation NMR spectrum;  $m/z = 846$  ( $[\{\text{Pt}(\text{C} \equiv \text{CC}_5\text{H}_4\text{N}-2)_4\}(\text{NBu}_4) + 1]^+$ , 100%), 604 ( $[\text{Pt}(\text{C} \equiv \text{CC}_5\text{H}_4\text{N}-2)_4 + 1]^+$ , 81%);  $\nu_{\text{M}}(\text{CH}_3\text{NO}_2)$ : 123  $\text{cm}^{-1} \text{mol}^{-1}$ .

### Synthesis of $(\text{NBu}_4)_2[\text{Pt}(\text{C} \equiv \text{CC}_5\text{H}_4\text{N}-4)_4] \cdot 2\text{H}_2\text{O}$ **9b**·2H<sub>2</sub>O

This complex has been prepared following a similar procedure to that used for complex **2**, using THF as the solvent and a reaction temperature of  $-50^\circ\text{C}$ . The yellow solid thus obtained, which contains amounts of *para*-ethynylpyridine ( $\sim 15\%$ ), is washed with hexane ( $2 \times 5 \text{ cm}^3$ ) to give **9b** as a yellow solid. The following amounts of the starting materials were used:  $[\text{PtCl}_2(\text{tht})_2]$  (0.30 g, 0.68 mmol),  $\text{LiC} \equiv \text{CC}_5\text{H}_4\text{N}-4$  (4.75 mmol) and  $(\text{NBu}_4)\text{Br}$  (0.55 g, 1.71 mmol) (0.22g, 29% ) (Found: C, 63.84; H, 7.89; N, 7.28%.  $\text{C}_{60}\text{H}_{92}\text{N}_6\text{PtO}_2$  requires: C, 64.09; H, 8.25; N, 7.47%);  $\tilde{\nu}_{\text{max}}/\text{cm}^{-1}$  (C-C) 2086s and 2039sh;  $\delta_{\text{H}}$  ( $\text{CD}_3\text{COCD}_3$ , 293 K) 8.22 [8H, d,  $J(\text{H-H})$  5.5,  $\text{C}_5\text{H}_4\text{N}-4$ ], 7.04 [8H, d,  $J(\text{H-H})$  5.5,  $\text{C}_5\text{H}_4\text{N}-4$ ], 3.66 (16H, m, N- $\text{CH}_2^-$ ,  $\text{NBu}_4$ ), 1.88 (16H, m,  $-\text{CH}_2^-$ ,  $\text{NBu}_4$ ), 1.51 (16H, m,  $-\text{CH}_2^-$ ,  $\text{NBu}_4$ ) and 0.93 (24H, t,  $-\text{CH}_3$ ,  $\text{NBu}_4$ );  $\delta_{\text{C}}\{^1\text{H}\}$  ( $\text{CDCl}_3$ , 298 K) 148.4 (s,  $\text{C}^2$ ); 139.1 (s,  $\text{C}^4$ ); 126.0 (s,  $\text{C}^3$ ), 123.3 [s,  $^1J(\text{C-Pt})$  995.7, C ], 102.6 [s,  $^2J(\text{C-Pt}) = 297.7$ , C ], 58.6 (s, N- $\text{CH}_2^-$ ,  $\text{NBu}_4$ ), 23.9 (s,  $-\text{CH}_2^-$ ,  $\text{NBu}_4$ ), 19.5 (s,  $-\text{CH}_2^-$ ,  $\text{NBu}_4$ ) and 13.8 (s,  $-\text{CH}_3$ ,  $\text{NBu}_4$ );  $m/z$  845 ( $\{\text{Pt}(\text{C} \equiv \text{CC}_5\text{H}_4\text{N}-2)_4\}(\text{NBu}_4)^+$ , 100%);  $\nu_{\text{M}}(\text{CH}_3\text{NO}_2)$ : 79  $\text{cm}^{-1} \text{mol}^{-1}$ .

<sup>1</sup> A. Sebal, B. Wrackmeyer, C. R. Theocharis and W. Jones, *J. Chem. Soc., Dalton Trans.*, 1984, 747.

<sup>2</sup> V. W. W. Yam, K. -L. Yu and K. K. Cheung, *J. Chem. Soc., Dalton Trans.*, 1999, 2913.

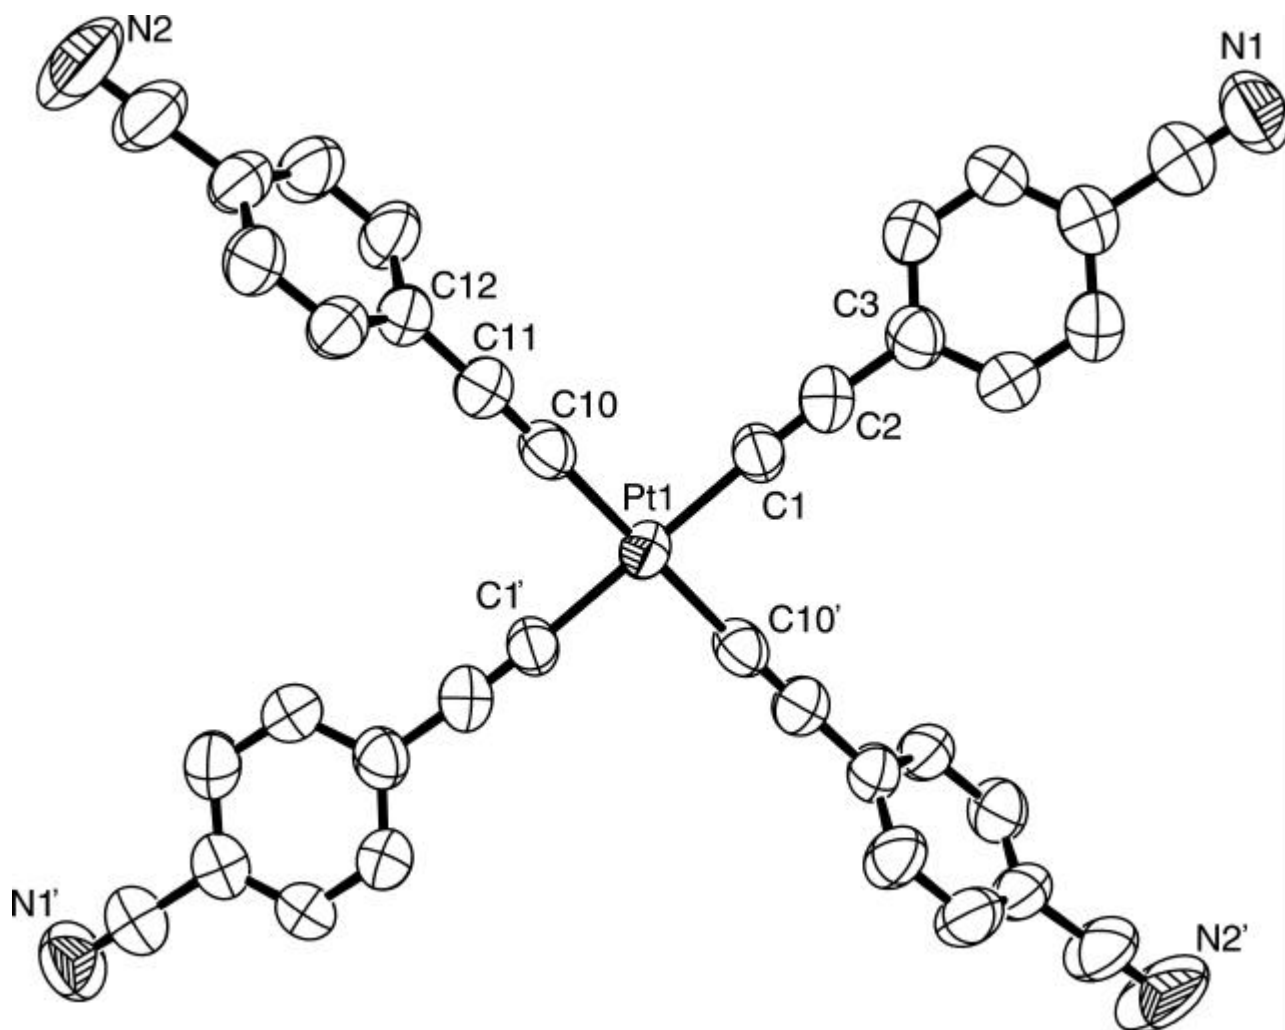

**Figure S1** Molecular structure of the anion  $[\text{Pt}\{\text{C}\equiv\text{C}(4\text{-CN})\text{C}_6\text{H}_4\}_4]^{2-}$  **6**. Ellipsoids are drawn at the 50 % probability level. Hydrogen atoms have been omitted for clarity. Symmetry transformation used to generate equivalent atoms:  $2-x, -y, -z$ .

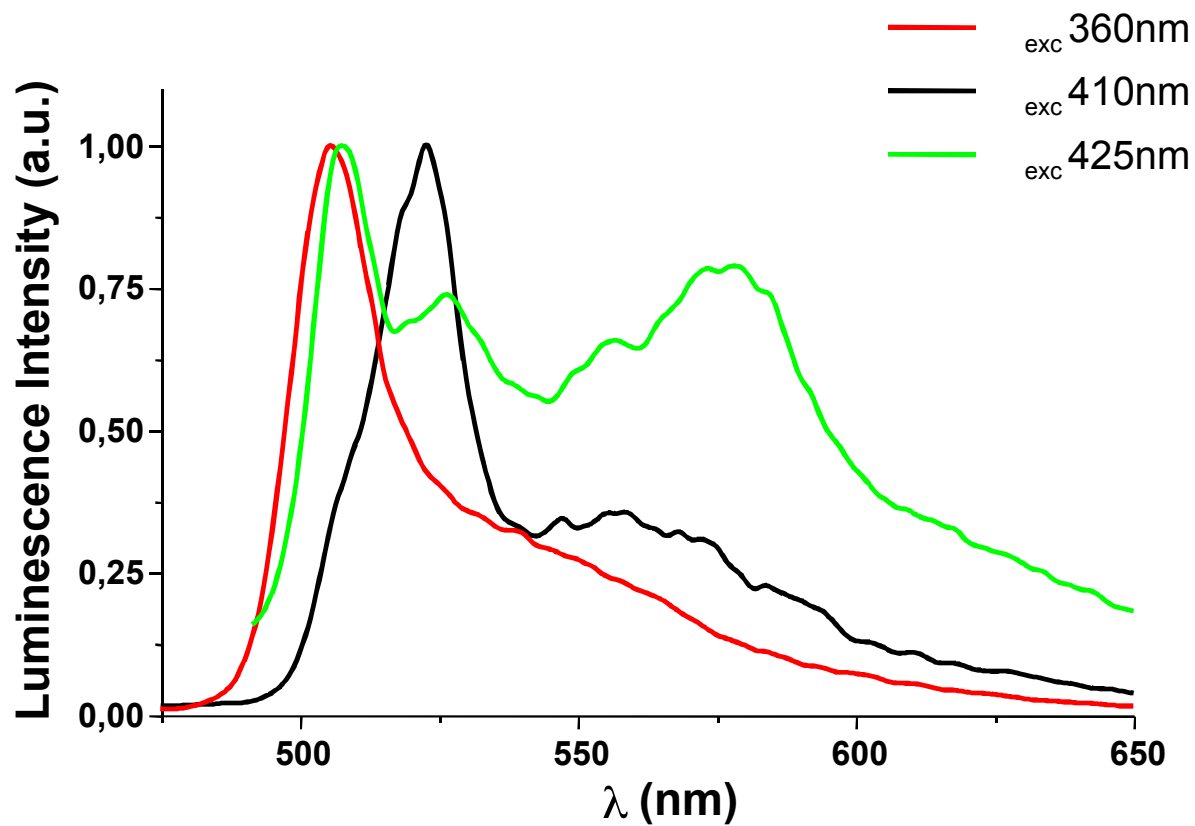

**Figure S2** Emission spectra of complex **7** in CH<sub>2</sub>Cl<sub>2</sub> at 77K by exciting at different (nm) (concentration 10<sup>-3</sup> M).



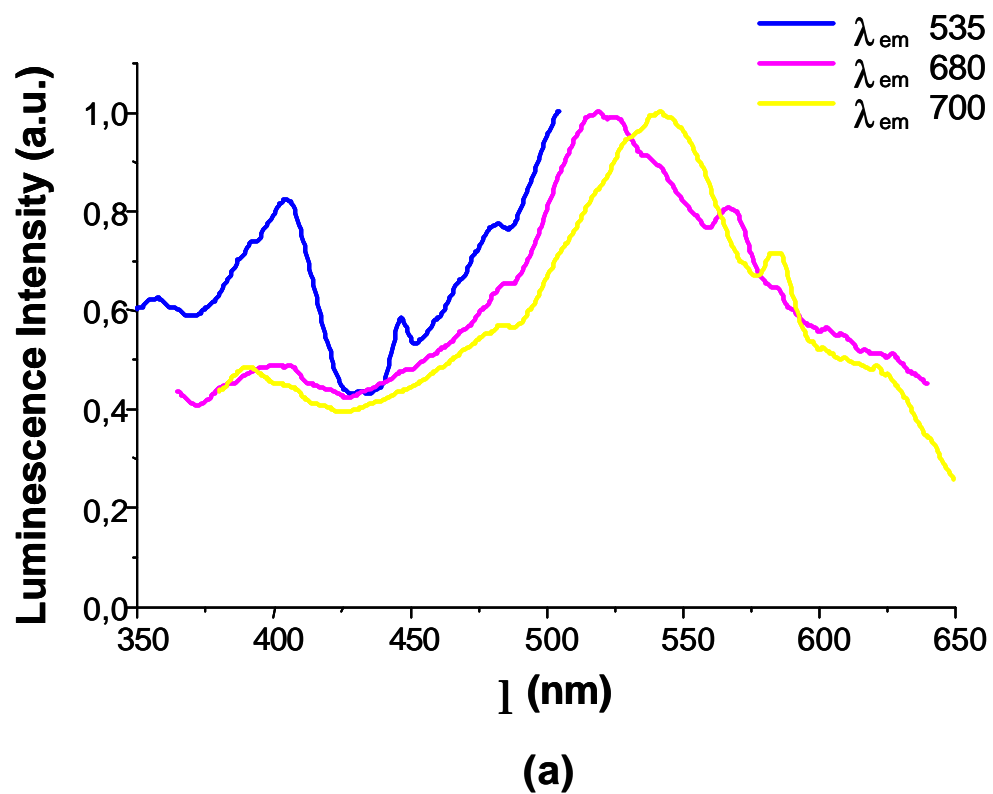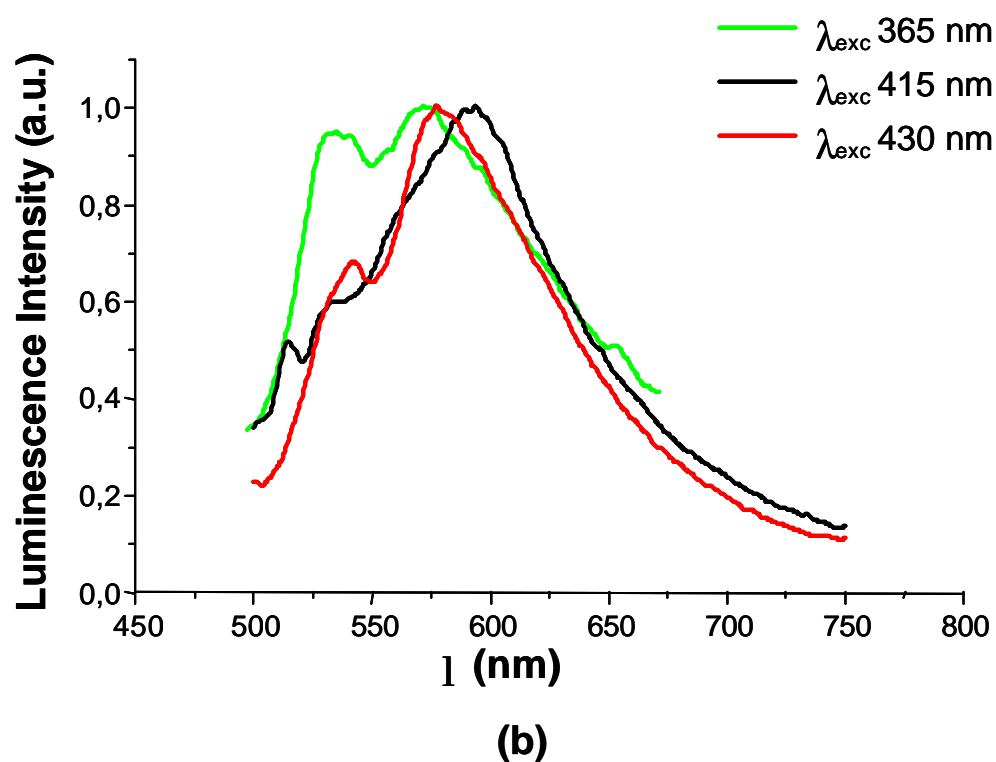

**Figure S3** Excitation (a) and emission (b) spectra of complex **3** in KBr pellets at room temperature by exciting at different  $\lambda$  (nm).

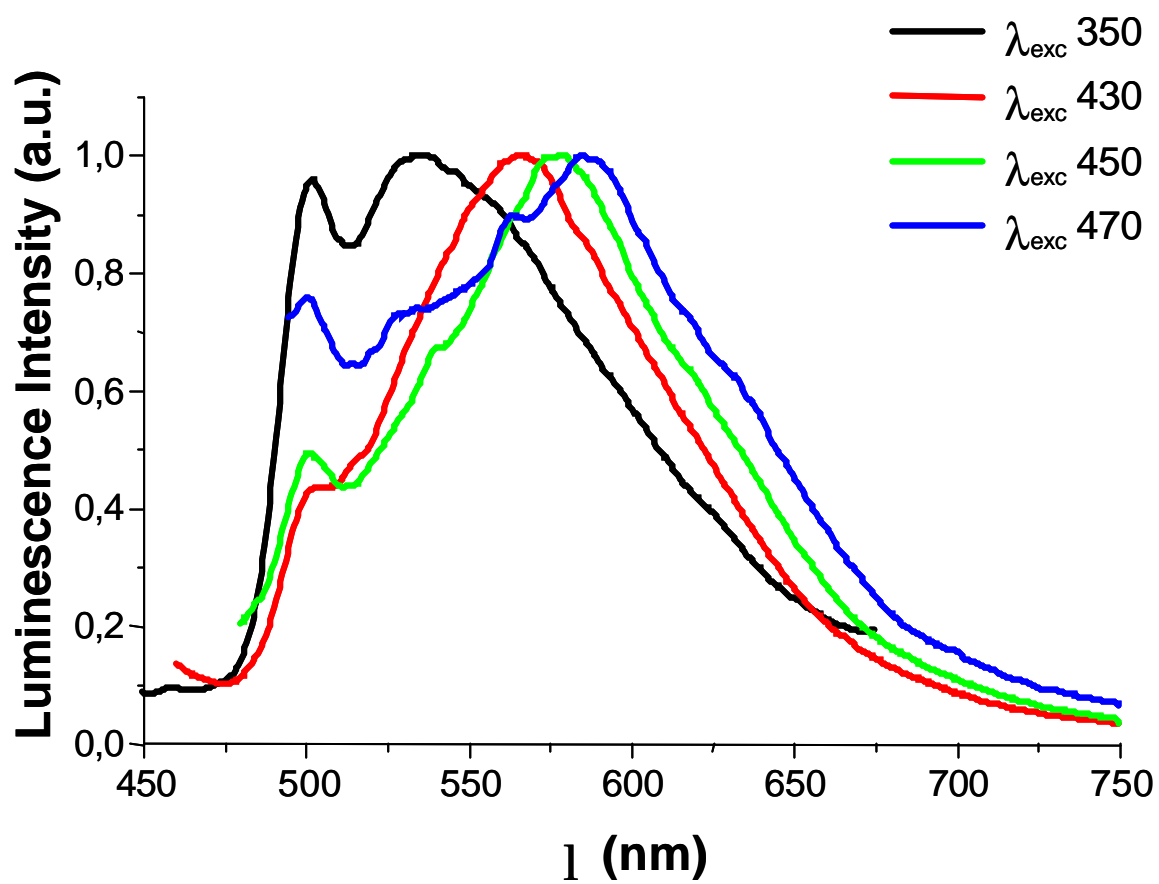

**Figure S4.** Emission spectra of complex **6** in KBr pellets at room temperature by exciting at different  $\lambda$  (nm).

**Table S1.** Population analysis (%) for the anion  $[\text{Pt}\{\text{C} \text{ C}(4\text{-CN})\text{C}_6\text{H}_4\}_4]^{2-}$  of complex **6**

|        | Pt   | C C  | C CC <sub>6</sub> H <sub>4</sub> CN |
|--------|------|------|-------------------------------------|
| HOMO-5 | 10.7 | 33.3 | 89.3                                |
| HOMO-4 | 2.2  | 49.7 | 97.8                                |
| HOMO-3 | 56.4 | 30.3 | 43.6                                |
| HOMO-2 | 11.1 | 38.3 | 89.9                                |
| HOMO-1 | 18.9 | 28.9 | 81.1                                |
| HOMO   | 19.7 | 29.7 | 80.3                                |
| LUMO   | 2.0  | 12.4 | 98.0                                |
| LUMO+1 | 1.1  | 13.4 | 98.9                                |
| LUMO+2 | 4.6  | 12.4 | 95.4                                |
| LUMO+3 | 3.3  | 12.8 | 96.7                                |
| LUMO+4 | 0.3  | 2.1  | 99.7                                |

**Table S2.** Emission and excitation spectral data for complexes **1**, **2**, **3**, **4** and **6** in  $10^{-3}$  M solutions of different solvents

| Compound | $\lambda_{exc}/nm$ | $\lambda_{em}/nm$                                   |                                                                      |
|----------|--------------------|-----------------------------------------------------|----------------------------------------------------------------------|
| <b>1</b> | acetone(298)       | 386                                                 | 397, 422, 457                                                        |
|          | acetone(77)        | 342, 354, 362                                       | 451, 472, 497                                                        |
|          | acetonitrile(298)  | 382                                                 | 396, 419, 430 (sh), 448                                              |
|          | acetonitrile(77)   | 360                                                 | 451, 471, 486, 498                                                   |
|          | toluene(298)       | 389                                                 | 399, 425, 436, 455 (sh)                                              |
|          | toluene(77)        | 339, 360                                            | 451, 471, 485, 497                                                   |
| <b>2</b> | acetone(298)       | 388, 399, 408                                       | 459, 508                                                             |
|          | acetone(77)        | 315, 334 (sh), 354                                  | 450, 469, 485, 495, 522                                              |
|          | acetonitrile(298)  | 385, 438 (sh), 453 (sh)                             | 457, 479, 505                                                        |
|          | acetonitrile(77)   | 333, 350                                            | 449, 470, 483, 495, 521                                              |
|          | toluene(298)       | 388, 392, 406                                       | 456, 502 (max)                                                       |
|          | toluene(77)        | 333, 354 <sup>a</sup><br>333, 357, 395 <sup>c</sup> | 450 (max), 470 (sh), 500 <sup>b</sup><br>450, 500 (max) <sup>d</sup> |
| <b>3</b> | Acetonitrile (77)  | 386                                                 | 519, 555                                                             |
| <b>4</b> | acetone(298)       | 407, 426, 453                                       | 479                                                                  |
|          | acetone(77)        | 315, 334, 359, 381                                  | 468, 489, 504, 519                                                   |
|          | acetonitrile(298)  | 394, 423, 437                                       | 472                                                                  |
|          | acetonitrile(77)   | 345, 365                                            | 462, 489 (sh), 511 (sh)                                              |
|          | toluene(298)       | 406, 424 (sh)                                       | 470, 502 (sh), 520 (sh)                                              |
|          | toluene(77)        | 358, 382, 400                                       | 468, 498, 520                                                        |
| <b>6</b> | acetone(298)       | 447, 464 (sh), 484 (sh),<br>497 (sh)                | 514                                                                  |
|          | acetone(77)        | 327, 343, 397                                       | 499, 526, 551                                                        |
|          | acetonitrile(298)  | 423, 445                                            | 505, 542(sh)                                                         |
|          | acetonitrile(77)   | 402                                                 | 504, 598                                                             |
|          | toluene(298)       | 430, 444, 474, 489                                  | 502                                                                  |
|          | toluene(77)        | 355, 377, 402                                       | 500, 525, 541, 555                                                   |

a)  $\lambda_{em} = 450nm$ ; b)  $\lambda_{exc} = 350 nm$ ; c)  $\lambda_{em} = 500 nm$ ; d)  $\lambda_{exc} = 397 nm$ ;

**Table S3.** TD-DFT RPA (random phase approximation) singlet excitation calculations for the anion  $[\text{Pt}\{\text{C C}(4\text{-CN})\text{C}_6\text{H}_4\}_4]^{2-}$  of complex **6**

| Transition |        | Contributions | o.s.  | $\lambda_{\text{exc}}(\text{calc})/\text{nm}$ |
|------------|--------|---------------|-------|-----------------------------------------------|
| HOMO       | LUMO   | 0.63          | 0.071 | 470                                           |
| HOMO       | LUMO+1 | 0.23          |       |                                               |
| HOMO-2     | LUMO   | 0.52          | 0.070 | 449                                           |
| HOMO       | LUMO+1 | 0.36          |       |                                               |
| HOMO-1     | LUMO   | 0.61          | 0.682 | 428                                           |
| HOMO-1     | LUMO+1 | 0.23          |       |                                               |
| HOMO-1     | LUMO+1 | 0.64          | 0.231 | 413                                           |
| HOMO-1     | LUMO   | 0.19          |       |                                               |
| HOMO-2     | LUMO+1 | 0.60          | 0.753 | 399                                           |
| HOMO       | LUMO+1 | 0.25          |       |                                               |
| HOMO-5     | LUMO   | 0.64          | 0.218 | 362                                           |
| HOMO-5     | LUMO+2 | 0.17          |       |                                               |
| HOMO-2     | LUMO   | 0.12          |       |                                               |
